# Supplementary material
Source: publisher site journal article supplement (https://www.dovepress.com/get_supplementary_file.php?f=441799.xlsx)
Supplement: Supplementary file 1 [file get_supplementary_file.php]

## Sheet: Supplementary material 1
Supplementary material 1: Between-group comparison from the two-way ANOVA
Article: Frequentist, Bayesian Analysis and Complementary Statistical Tools for Geriatric and Rehabilitation Fields: Are Traditional Null-hypothesis Significance Testing Methods Sufficient?
The purpose of this supplemmentary file is to provide an example of analyses outlined in the point of view. The subsections of this template follows the structure of the point of view, and construct a hypothetical research study investigating the effects of 15-weeks of pilates training and control on muscle strength assessed by handgrip strength. The use of this spreadsheet will only be used afte…
					Handgrip strength		Baseline Testing		Post-Intervention Testing				This sheet contains the hypothetical study data used to perform calculations that are presented within this supplementary file. The sheet was adapted from Swinton, P. A., Hemingway, B. S., Saunders, B., Gualano, B., & Dolan, E. (2018). A statistical framework to interpret individual response to intervention: paving the way for personalized nutrition and exercise prescription. Frontiers in Nutriti…
Participant		Group	PT or Con		HG_test1	HG_test2	Handgrip strength		Handgrip strength
1º		0	PT		18	19	18.5		19
2º		0	PT		19	21	20		22
3º		0	PT		21	21	21		22
4º		0	PT		18	19	18.5		19
5º		0	PT		18	19	18.5		21
6º		0	PT		16	17	16.5		19
7º		0	PT		19	19	19		22
8º		0	PT		18	18	18		20
9º		0	PT		18	18	18		20
10º		0	PT		19	20	19.5		21
11º		0	PT		21	22	21.5		23
12º		0	PT		21	22	21.5		23
13º		0	PT		19	21	20		21
14º		0	PT		17	18	17.5		19
15º		0	PT		18	19	18.5		21
16º		1	CON		19	20	19.5		21
17º		1	CON		18	21	19.5		20
18º		1	CON		19	20	19.5		19
19º		1	CON		19	21	20		21
20º		1	CON		18	19	18.5		19
21º		1	CON		18	19	18.5		19
22º		1	CON		17	19	18		19
23º		1	CON		16	18	17		18
24º		1	CON		16	19	17.5		19			According to the traditional statistical analyses, the mean values for HGS at post-training were 20.80 ± 1.42 and 19.86 ± 1.50 for PT and CG, respectively, and did not differ significantly between the groups (p = 0.262) (Table 1_SS_01). Regarding the within-group comparisons, only the PT group displayed a significant statistical increment of 1.70 kg for HGS (p = 0.003) between time-points.
25º		1	CON		16	18	17		18
26º		1	CON		17	19	18		18
27º		1	CON		21	22	21.5		22
28º		1	CON		20	21	20.5		21
29º		1	CON		20	22	21		22
30º		1	CON		21	22	21.5		22
Note: please, do not alter data because the table above is linked between sheets.
PT		Pilates training
CON		Control Group
HG		Handgrip strength

## Sheet: Supplementary material 2 
Supplementary material 2: Minimal Clinical Important Difference and Magnitude-based inference analysis
Estimating Technical Error from test-retest reliability (Instructions)				Computing True Score Confidence Intervals
STEP 1	Calculate the test-retest difference scores [Test(2)-Test(1)] for each individual handgrip strength.			STEP 4	Locate the TE for the main outcome and identify the multiple required for the different CI according to the number of subjects. In this example, 0.69 is the multiple required.				For a better understanding of step four, readers are directed to: Swinton, P. A., Hemingway, B. S., Saunders, B., Gualano, B., & Dolan, E. (2018). A statistical framework to interpret individual response to intervention: paving the way for personalized nutrition and exercise prescription. Frontiers in Nutrition, 5, 41.
STEP 2	Calculate standard deviation of the difference scores.			STEP 5	For the lower bound (LB) of each CI ,subtract the required multiple of TE estimate from the observed score.
														To verify responsiveness, we used the MCID observed for HGS. Thus, every participant who achieved a increment of HGS higher or equal 1.18 kg, was considered a responder highlighted with green color.
STEP 3	Estimate typical error (TE) by dividing the standard deviation of the difference scores by √2.			STEP 6	For the upper bound (UB) of each CI, add the required multiple of TE estimate from the observed score.
										Difference Scores
								Handgrip strength		Handgrip Strength										CI MBI
				Participant		PT or Con		HG_test1	HG_test2	Test (2) - Test (1)		Baseline Testing		Post-Testing		Pre-Post Differences Score				LB	UP
				1º		PT		18	19	1		18.5		19		0.5			0.546452	-0.0464521	1.04645
				2º		PT		19	21	2		20		22		2			0.546452	1.45355	2.54645
				3º		PT		21	21	0		21		22		1			0.546452	0.453548	1.54645
				4º		PT		18	19	1		18.5		19		0.5			0.546452	-0.0464521	1.04645
				5º		PT		18	19	1		18.5		21		2.5			0.546452	1.95355	3.04645
				6º		PT		16	17	1		16.5		19		2.5			0.546452	1.95355	3.04645
				7º		PT		19	19	0		19		22		3			0.546452	2.45355	3.54645
				8º		PT		18	18	0		18		20		2			0.546452	1.45355	2.54645
				9º		PT		18	18	0		18		20		2			0.546452	1.45355	2.54645
				10º		PT		19	20	1		19.5		21		1.5			0.546452	0.953548	2.04645
				11º		PT		21	22	1		21.5		23		1.5			0.546452	0.953548	2.04645
				12º		PT		21	22	1		21.5		23		1.5			0.546452	0.953548	2.04645
				13º		PT		19	21	2		20		21		1			0.546452	0.453548	1.54645
				14º		PT		17	18	1		17.5		19		1.5			0.546452	0.953548	2.04645
				15º		PT		18	19	1		18.5		21		2.5			0.546452	1.95355	3.04645
				16º		CON		19	20	1		19.5		21		1.5			0.546452	0.953548	2.04645
				17º		CON		18	21	3		19.5		20		0.5			0.546452	-0.0464521	1.04645
				18º		CON		19	20	1		19.5		19		-0.5			0.546452	-1.04645	0.0464521
				19º		CON		19	21	2		20		21		1			0.546452	0.453548	1.54645
				20º		CON		18	19	1		18.5		19		0.5			0.546452	-0.0464521	1.04645
				21º		CON		18	19	1		18.5		19		0.5			0.546452	-0.0464521	1.04645
				22º		CON		17	19	2		18		19		1			0.546452	0.453548	1.54645
				23º		CON		16	18	2		17		18		1			0.546452	0.453548	1.54645
				24º		CON		16	19	3		17.5		19		1.5			0.546452	0.953548	2.04645
				25º		CON		16	18	2		17		18		1			0.546452	0.453548	1.54645
				26º		CON		17	19	2		18		18		0			0.546452	-0.546452	0.546452
				27º		CON		21	22	1		21.5		22		0.5			0.546452	-0.0464521	1.04645
				28º		CON		20	21	1		20.5		21		0.5			0.546452	-0.0464521	1.04645
				29º		CON		20	22	2		21		22		1			0.546452	0.453548	1.54645
				30º		CON		21	22	1		21.5		22		0.5			0.546452	-0.0464521	1.04645
								Standard Deviation		0.784915		1.47352		← Standard deviation of pre-intervention scores
								Typical Error (TE)		0.555019		1.17882		←MCID
										Computing the Minimal Clinical Important Difference (MCID)
										STEP 7	To compute the MCID we first start by calculating the between-subject standard deviation of the baseline testing scores for handgrip strength. For example, for handgrip strength, this works out to be 1.47. The next step is to multiply this by 0.8, to obtain our MCID. In the case of handgrip, this equals +1.18. In our calculations, instead of using a zero threshold as shown above, the MCID can be …

## Sheet: Supplementary Table 1
Supplementary table 1: Raw data
GROUP	TIME	HGS
0	0	18.5
0	0	20
0	0	21
0	0	18.5
0	0	18.5
0	0	16.5
0	0	19
0	0	18
0	0	18
0	0	19.5
0	0	21.5
0	0	21.5
0	0	20
0	0	17.5
0	0	18.5
0	1	19
0	1	22
0	1	22
0	1	19
0	1	21
0	1	19
0	1	22
0	1	20
0	1	20
0	1	21
0	1	23
0	1	23
0	1	21
0	1	19
0	1	21
1	0	19.5
1	0	19.5
1	0	19.5
1	0	20
1	0	18.5
1	0	18.5
1	0	18
1	0	17
1	0	17.5
1	0	17
1	0	18
1	0	21.5
1	0	20.5
1	0	21
1	0	21.5
1	1	21
1	1	20
1	1	19
1	1	21
1	1	19
1	1	19
1	1	19
1	1	18
1	1	19
1	1	18
1	1	18
1	1	22
1	1	21
1	1	22
1	1	22
Explanatory notes:
GROUP
0 = PT
1 = CON
TIME
0 = BASELINE
1 = POST

## Sheet: Supplementary table 2
Supplementary table 2: Effect size (ES) and delta analysis
GROUPS	BASELINE	POST	DELTA
0	18.5	19	0.5
0	20	22	2
0	21	22	1
0	18.5	19	0.5
0	18.5	21	2.5
0	16.5	19	2.5
0	19	22	3
0	18	20	2
0	18	20	2
0	19.5	21	1.5
0	21.5	23	1.5
0	21.5	23	1.5
0	20	21	1
0	17.5	19	1.5
0	18.5	21	2.5
MEAN	19.1	20.8	1.7	ES	1.15939
SD	1.46629	1.42428	0.75119
1	19.5	21	1.5
1	19.5	20	0.5
1	19.5	19	-0.5
1	20	21	1
1	18.5	19	0.5
1	18.5	19	0.5
1	18	19	1
1	17	18	1
1	17.5	19	1.5
1	17	18	1
1	18	18	0
1	21.5	22	0.5
1	20.5	21	0.5
1	21	22	1
1	21.5	22	0.5
MEAN	19.1667	19.8667	0.7	ES	0.457093
SD	1.53142	1.50555	0.527799
Explanatory notes:
GROUP
0 = PT
1 = CON
TIME
0 = BASELINE
1 = POST
